# Supplementary material for: Lactide polymerization by well-defined calcium coordination complexes: comparisons with related magnesium and zinc chemistry
Source: Royal Society of Chemistry journal article supplement (doi:10.1039/b208679d), 2002-12-19
Supplement: b208679d.doc [file b208679d.doc]

† ***Syntheses*:** LCa[N(SiMe3)2]THF, **1**: 15 ml THF was added to a mixture of the -diiminate ligand LH (0.250 g, 0.598 mmol) and KN(SiMe3)2 (0.238 g, 1.19 mmol). After stirring for 1 h, the mixture was added to a slurry of CaI2 (0.176 g, 0.599 mmol) in 5 ml THF and stirred overnight. After filtration, the volatile components were removed under dynamic vacuum giving compound **1** (0.33 g, 80%). X-ray quality crystals were obtained by placing a concentrated hexanes solution in a freezer overnight. 1H NMR (C6D6, 400 MHz): 7.20-7.10 (m, 6H, Ar-H), 4.85 (s, 1H, -CH), 3.37 (m, 4H, O(C*H*2CH2)2), 3.25 (sept, 4H, C*H*Me2), 1.69 (s, 6H, -CH3), 1.36 (d, 12H, CH*Me*2), 1.26 (d, 12H, CH*Me*2), 1.11 (m, 4H, O(CH2C*H*2)2), 0.20 (s, 18H, SiMe3).

CaL2: The synthesis of CaL2 follows the preparation for compound **1** except that 2 equiv of LH (0.500 g, 1.19 mmol) was used giving CaL2 (0.39 g, 75%). 1H NMR (C6D6): 7.25-6.80 (m, 12H, Ar-H), 4.93 (s, 2H, -CH), 3.17 (sept, 2H, C*H*Me2), 2.99 (sept, 4H, C*H*Me2), 2.60 (sept, 2H, C*H*Me2), 1.82 (s, 6H, -CH3), 1.54 (s, 6H, -CH3), 1.49, 1.29, 1.24, 1.19, 1.01, 0.97, 0.50, 0.46 (d, 6H each, CH*Me*2).

[HB(3-tBupz)3]CaN(SiMe3)2, **2**: 15 ml THF was added to a mixture of [HB(3-tBupz)3]K (0.300 g, 0.714 mmol), CaI2 (0.210 g, 0.715 mmol) and KN(SiMe3)2 (0.142 g, 0.712 mmol). The cloudy white mixture was then stirred overnight and filtered. Any volatile components were removed under dynamic vacuum and the product was redissolved in 15 ml benzene. After filtration and subsequent solvent removal, the product was obtained as a white solid (0.36 g, 86%). 1H NMR (C6D6): 7.41 (d, 3H, 5-H), 5.80 (d, 3H, 4-H), 1.35 (s, 27H, tBu), 0.34 (s, 18H, SiMe3).

[3-HB(3-tBupz)3]Ca(O-2,6-iPr2C6H3)THF, **3**: 2,6-diisopropylphen-ol (0.160 ml, 0.860 mmol) was added dropwise to a solution of [HB(3-tBupz)3]CaN(SiMe3)2 (0.500 g, 0.860 mmol) in 15 ml THF. The solution was stirred overnight and solvent was then removed giving compound **3** (0.54 g, 94%). 1H NMR (C6D6): 7.49 (d, 3H, 5-H), 7.33 (d, 2H, *m*-ArH), 7.00 (t, 1H, *p*-ArH), 5.86 (d, 3H, 4-H), 3.90 (br, 2H, C*H*Me2), 3.22 (br, 4H, O(C*H*2CH2)2), 1.41 (d, 12H, CH*Me*2), 1.31 (s, 27H, tBu), 1.14 (br, 4H, O(CH2C*H*2)2).

[3-HB(3-iPrpz)3]CaN(SiMe3)2THF, **4**: The synthesis follows the preparation of compound **2** by starting with [HB(3-iPrpz)3]K (0.270 g, 0.713 mmol) giving compound **4** (0.31 g, 71%). 1H NMR (C6D6): 7.50 (d, 3H, 5-H), 5.87 (d, 3H, 4-H), 3.57 (m, 4H, O(C*H*2CH2)2), 3.41 (br, 3H, C*H*Me2), 1.26 (m, 4H, O(CH2C*H*2)2), 1.19 (d, 18H, CH*Me*2), 0.41 (s, 18H, Si*Me*3).

[3-HB(3-tBupz)3]Ca(O-2,6-iPr2C6H3), **5**: Compound **3** (0.500 g, 0.746 mmol) was heated to 150C under vacuum for 1 h giving compound **5** in quantitative yield. X-ray quality crystals were obtained by placing a concentrated toluene solution in a freezer overnight. 1H NMR (C6D6): 7.44 (d, 3H, 5-H), 7.32 (d, 2H, *m*-ArH), 7.00 (t, 1H, *p*-ArH), 5.80 (d, 3H, 4-H), 3.81 (sept, 2H, C*H*Me2), 1.39 (d, 12H, CH*Me*2), 1.27 (s, 27H, tBu).

**Crystallographic details for LCaN(SiMe3)2.THF**

Empirical formula C39 H67 Ca N3 O Si2 + 0.5 hexane

Formula weight 733.30

Temperature 200(2) K

Wavelength 0.71073 Å

Crystal system Triclinic

Space group P1bar

Unit cell dimensions *a* = 11.9120(1) Å

*b* = 13.2215(1) Å

*c* = 16.8877(1) Å

 = 70.150(1) º.

 = 80.422(1) º.

 = 63.507(1) º.

Volume 2238.64(3) A3

Z 2

Density (calculated) 1.088 Mg/m3

Absorption coefficient 0.226 mm-1

F(000) 806

Crystal size 0.31 x 0.35 x 0.38 mm

Theta range for data collection 2.04 - 27.49 º

Index ranges -15<=h<=15, -17<=k<=17, -21<=l<=21

Reflections collected 47522

Independent reflections 10257 [R(int) = 0.028]

Refinement method Full-matrix least-squares on F2

Data / restraints / parameters 10257 / 0 / 456

Goodness-of-fit on F2 1.044

Final R indices [I>2sigma(I)] R1 = 0.0479, wR2 = 0.1261

R indices (all data) R1 = 0.0633, wR2 = 0.1362

Largest diff. peak and hole 0.912 and -0.683 e/A3

**Crystallographic details for CaL2.**

Empirical formula C58 H82 Ca1 N4

Formula weight 437.68

Temperature 200(2) K

Wavelength 0.71073 Å

Crystal system monoclinic

Space group C2/c

Unit cell dimensions *a* = 19.5130(2) Å

*b* = 12.5265(1) Å

*c* = 22.1472(2) Å

 = 100.280(1) º.

Volume 5326.53(8) A3

Z 4

Density (calculated) 1.092 Mg/m3

Absorption coefficient 0.157 mm-1

F(000) 1912

Crystal size 0.08 x 0.27 x 0.38 mm

Theta range for data collection 2.07 - 27.48 º

Index ranges -25<=h<=25, -16<=k<=16, -28<=l<=28

Reflections collected 46450

Independent reflections 6114 [R(int) = 0.039]

Refinement method Full-matrix least-squares on F2

Data / restraints / parameters 6114 / 0 / 295

Goodness-of-fit on F2 1.055

Final R indices [I>2sigma(I)] R1 = 0.0448, wR2 = 0.1209

R indices (all data) R1 = 0.0635, wR2 = 0.1317

Largest diff. peak and hole 0.262 and -0.193 e/A3

**Crystallographic details for [3-HB(3-tBupz)3]Ca(O-2,6-iPr2C6H3)**

Empirical formula C33 H51 B Ca N6 O

Formula weight 598.69

Temperature 200(2) K

Wavelength 0.71073 Å

Crystal system monoclinic

Space group P21/c

Unit cell dimensions *a* = 15.1765(1) Å

*b* = 11.7374(1) Å

*c* = 20.8849(2) Å

 = 110.690(1) º.

Volume 3480.34(5) A3

Z 4

Density (calculated) 1.143 Mg/m3

Absorption coefficient 0.214 mm-1

F(000) 1296

Crystal size 0.27 x 0.27 x 0.31 mm

Theta range for data collection 2.07 - 27.49 º

Index ranges -19<=h<=19, -15<=k<=15, -27<=l<=27

Reflections collected 60025

Independent reflections 7975 [R(int) = 0.033]

Refinement method Full-matrix least-squares on F2

Data / restraints / parameters 7975 / 0 / 392

Goodness-of-fit on F2 1.040

Final R indices [I>2sigma(I)] R1 = 0.0406, wR2 = 0.1026

R indices (all data) R1 = 0.0542, wR2 = 0.1102

Largest diff. peak and hole 0.334 and -0.248 e/A3
